# Supplementary figures and images for: Characterization of three phases of liquid carbon by tight-binding molecular dynamics simulations
Source: Royal Society of Chemistry journal article supplement (doi:10.1039/d0cp01875a), 2020-01-01

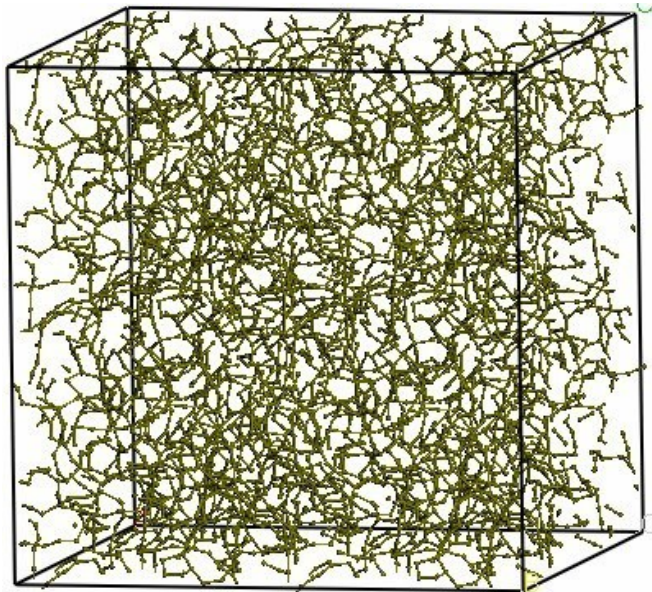

Supplement: d0cp01875a2.pdf [file d0cp01875a2.pdf]

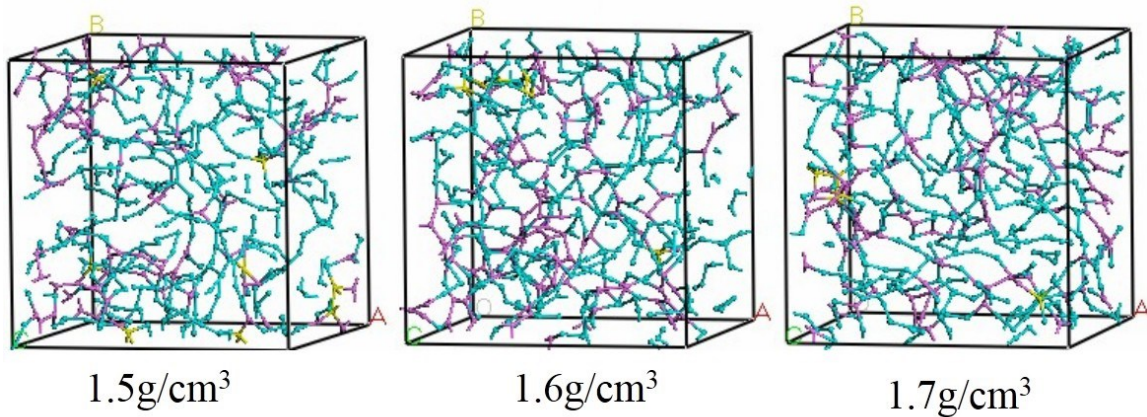

Supplement: d0cp01875a3.pdf [file d0cp01875a3.pdf]
